# Supplementary material
Source: publisher figshare collection journal article supplement (https://gsajournals.figshare.com/ndownloader/files/14675444)
Supplement: Supplementary file 1 [file 14675444]

## Sheet: Center
#1_10-08-15
Frame	time, sec	F total
200	0.031	2613518
201	0.062	2676737
202	0.093	2719424
203	0.124	2782027
204	0.155	2740531
205	0.186	2667662
206	0.217	2584030
207	0.248	2516364
208	0.279	2447687
209	0.31	2397000
210	0.341	2319077
211	0.372	2268482
212	0.403	2223133
213	0.434	2190439
214	0.465	2143441
215	0.496	2088342
216	0.527	2049309
217	0.558	2011788
218	0.589	1994804
219	0.62	2024322
220	0.651	2209336
221	0.682	2427561
222	0.713	2580949
223	0.744	2700315
224	0.775	2748598
225	0.806	2848302
226	0.837	2817463
227	0.868	2751428
228	0.899	2694860
229	0.93	2605561
230	0.961	2514254
231	0.992	2445419
232	1.023	2383717
233	1.054	2331278
234	1.085	2255700
235	1.116	2202110
236	1.147	2152008
237	1.178	2197314
238	1.209	2384799
239	1.24	2548396
240	1.271	2678512
241	1.302	2770245
242	1.333	2816287
243	1.364	2881155
244	1.395	2836244
245	1.426	2763503
246	1.457	2681423
247	1.488	2603938
248	1.519	2540838
249	1.55	2457118
250	1.581	2385519
251	1.612	2326166
252	1.643	2265608
253	1.674	2221008
254	1.705	2142938
255	1.736	2090221
256	1.767	2043895
257	1.798	2058061
258	1.829	2235992
259	1.86	2408426
260	1.891	2534718
261	1.922	2619699
262	1.953	2674382
263	1.984	2748205
264	2.015	2730637
265	2.046	2647969
266	2.077	2539560
267	2.108	2475511
268	2.139	2415985
269	2.17	2346633
270	2.201	2296993
271	2.232	2243108
272	2.263	2211260
273	2.294	2164745
274	2.325	2107030
275	2.356	2060688
276	2.387	2101232
277	2.418	2286074
278	2.449	2486574
279	2.48	2601352
280	2.511	2697249
281	2.542	2736152
282	2.573	2788359
283	2.604	2709940
284	2.635	2631593
285	2.666	2552345
286	2.697	2482099
287	2.728	2418613
288	2.759	2336264
289	2.79	2269346
290	2.821	2209887
291	2.852	2157497
292	2.883	2199288
293	2.914	2362610
294	2.945	2517157
295	2.976	2641752
296	3.007	2720203
297	3.038	2765541
298	3.069	2764472
299	3.1	2725432
300	3.131	2658262
301	3.162	2586582
302	3.193	2517080
303	3.224	2420500
304	3.255	2350286
305	3.286	2290383
306	3.317	2239850
307	3.348	2181557
308	3.379	2115711
309	3.41	2178694
310	3.441	2362874
311	3.472	2501940
312	3.503	2627761
313	3.534	2670450
314	3.565	2692259
315	3.596	2700712
316	3.627	2643195
317	3.658	2590894
318	3.689	2499186
319	3.72	2428030
320	3.751	2360888
321	3.782	2288926
322	3.813	2224546
323	3.844	2148362
324	3.875	2097620
325	3.906	2047328
326	3.937	2021061
327	3.968	2202124
328	3.999	2360775
329	4.03	2494288
330	4.061	2589048
331	4.092	2635482
332	4.123	2640883
333	4.154	2585886
334	4.185	2514801
335	4.216	2440248
336	4.247	2380790
337	4.278	2298519
338	4.309	2222283
339	4.34	2160040
340	4.371	2100498
341	4.402	2067547
342	4.433	2003214
343	4.464	1941853
344	4.495	1929924
345	4.526	2094844
346	4.557	2258443
347	4.588	2379044
348	4.619	2471375
349	4.65	2502780
350	4.681	2514605
351	4.712	2484411
352	4.743	2411892
353	4.774	2333833
354	4.805	2256314
355	4.836	2190169
356	4.867	2128133
357	4.898	2053074
358	4.929	2002626
359	4.96	1946461
360	4.991	1914626
361	5.022	1862796
362	5.053	1940373
363	5.084	2111731
364	5.115	2242209
365	5.146	2370671
366	5.177	2415935
367	5.208	2425536
368	5.239	2430183
369	5.27	2372375
370	5.301	2326662
371	5.332	2251390
372	5.363	2175188
373	5.394	2116591
374	5.425	2059275
375	5.456	2020435
376	5.487	1961918
377	5.518	1901273
378	5.549	1853818
379	5.58	1809993
380	5.611	1774826
381	5.642	1735383
382	5.673	1688027
383	5.704	1653919
384	5.735	1732910
385	5.766	1895575
386	5.797	2010042
387	5.828	2122690
388	5.859	2209007
389	5.89	2245662
390	5.921	2262951
391	5.952	2212709
392	5.983	2160268
393	6.014	2103761
394	6.045	2045941
395	6.076	2005277
396	6.107	1948346
397	6.138	1892619
398	6.169	1856530
399	6.2	1810417
400	6.231	1785288
401	6.262	1733496
402	6.293	1696006
403	6.324	1705299
404	6.355	1833191
405	6.386	1986810
406	6.417	2079227
407	6.448	2173714
408	6.479	2211539
409	6.51	2216772
410	6.541	2209008
411	6.572	2140856
412	6.603	2083546
413	6.634	2020777
414	6.665	1975282
415	6.696	1921431
416	6.727	1862072
417	6.758	1818186
418	6.789	1776416
419	6.82	1748553
420	6.851	1695648
421	6.882	1664676
422	6.913	1636737
423	6.944	1600651
424	6.975	1611755
425	7.006	1730194
426	7.037	1875203
427	7.068	1986538
428	7.099	2094453
429	7.13	2140447
430	7.161	2143562
431	7.192	2125645
432	7.223	2073768
433	7.254	2027557
434	7.285	1974333
435	7.316	1899129
436	7.347	1848784
437	7.378	1810233
438	7.409	1777593
439	7.44	1724585
440	7.471	1687287
441	7.502	1645225
442	7.533	1609697
443	7.564	1587210
444	7.595	1547066
445	7.626	1522971
446	7.657	1526801
447	7.688	1672861
448	7.719	1807105
449	7.75	1894469
450	7.781	1987551
451	7.812	2051601
452	7.843	2085552
453	7.874	2080880
454	7.905	2035602
455	7.936	1982006
456	7.967	1928536
457	7.998	1884754
458	8.029	1842446
459	8.06	1787902
460	8.091	1740891
461	8.122	1700509
462	8.153	1672507
463	8.184	1631996
464	8.215	1590201
465	8.246	1555540
466	8.277	1530277
467	8.308	1511221
468	8.339	1474198
469	8.37	1452718
470	8.401	1460779
471	8.432	1567303
472	8.463	1699224
473	8.494	1775882
474	8.525	1870880
475	8.556	1954007
476	8.587	1994004
477	8.618	1996394
478	8.649	1966415
479	8.68	1927194
480	8.711	1876256
481	8.742	1838355
482	8.773	1796793
483	8.804	1748634
484	8.835	1708337
485	8.866	1669156
486	8.897	1645955
487	8.928	1609668
488	8.959	1565785
489	8.99	1530986
490	9.021	1502021
491	9.052	1483741
492	9.083	1445534
493	9.114	1436570
494	9.145	1535354
495	9.176	1656643
496	9.207	1769976
497	9.238	1852015
498	9.269	1909474
499	9.3	1937187
500	9.331	1956715
501	9.362	1954240
502	9.393	1909747
503	9.424	1847191
504	9.455	1799581
505	9.486	1755480
506	9.517	1727665
507	9.548	1682778
508	9.579	1636699
509	9.61	1603965
510	9.641	1578197
511	9.672	1559558
512	9.703	1535540
513	9.734	1488806
514	9.765	1459590
515	9.796	1431622
516	9.827	1417720
517	9.858	1381946
518	9.889	1400939
519	9.92	1519994
520	9.951	1638984
521	9.982	1742191
522	10.013	1805418
523	10.044	1869147
524	10.075	1844991
525	10.106	1838955
526	10.137	1817493
527	10.168	1766681
528	10.199	1724876
529	10.23	1685730
530	10.261	1644222
531	10.292	1624793
532	10.323	1577961
533	10.354	1546821
534	10.385	1519279
535	10.416	1489234
536	10.447	1468457
537	10.478	1440315
538	10.509	1495769
539	10.54	1603873
540	10.571	1688438
541	10.602	1783104
542	10.633	1848858
543	10.664	1885911
544	10.695	1882288
545	10.726	1883172
546	10.757	1834459
547	10.788	1777417
548	10.819	1731409
549	10.85	1688849
550	10.881	1667210
551	10.912	1619446
552	10.943	1565569
553	10.974	1535171
554	11.005	1507531
555	11.036	1491645
556	11.067	1455180
557	11.098	1411548
558	11.129	1388381
559	11.16	1363167
560	11.191	1362027
561	11.222	1357488
562	11.253	1335373
563	11.284	1311358
564	11.315	1288918
565	11.346	1277218
566	11.377	1253185
567	11.408	1226623
568	11.439	1210644
569	11.47	1199517
570	11.501	1197946
571	11.532	1183158

## Sheet: Posterior
Frame	time, sec	F total
200	0.031	2574417
201	0.062	2655409
202	0.093	2710320
203	0.124	2730440
204	0.155	2786923
205	0.186	2746046
206	0.217	2682458
207	0.248	2623450
208	0.279	2567288
209	0.31	2525508
210	0.341	2457601
211	0.372	2413309
212	0.403	2371848
213	0.434	2333152
214	0.465	2302671
215	0.496	2251444
216	0.527	2221510
217	0.558	2188812
218	0.589	2178124
219	0.62	2213072
220	0.651	2344008
221	0.682	2433538
222	0.713	2531486
223	0.744	2661469
224	0.775	2744628
225	0.806	2742620
226	0.837	2766452
227	0.868	2765247
228	0.899	2755630
229	0.93	2687552
230	0.961	2629456
231	0.992	2584605
232	1.023	2542035
233	1.054	2515714
234	1.085	2468673
235	1.116	2435986
236	1.147	2406296
237	1.178	2439855
238	1.209	2529433
239	1.24	2569879
240	1.271	2631312
241	1.302	2727749
242	1.333	2806969
243	1.364	2852498
244	1.395	2854380
245	1.426	2862065
246	1.457	2826015
247	1.488	2781506
248	1.519	2743231
249	1.55	2679475
250	1.581	2628503
251	1.612	2588970
252	1.643	2550479
253	1.674	2531625
254	1.705	2483138
255	1.736	2460981
256	1.767	2428976
257	1.798	2402735
258	1.829	2460224
259	1.86	2484061
260	1.891	2513810
261	1.922	2580618
262	1.953	2662899
263	1.984	2738994
264	2.015	2738606
265	2.046	2757008
266	2.077	2700963
267	2.108	2640542
268	2.139	2598590
269	2.17	2533033
270	2.201	2483692
271	2.232	2439535
272	2.263	2404473
273	2.294	2376957
274	2.325	2334455
275	2.356	2302101
276	2.387	2329527
277	2.418	2406774
278	2.449	2484772
279	2.48	2535941
280	2.511	2638544
281	2.542	2715695
282	2.573	2737413
283	2.604	2749214
284	2.635	2739728
285	2.666	2704925
286	2.697	2679715
287	2.728	2648318
288	2.759	2600551
289	2.79	2568414
290	2.821	2539522
291	2.852	2515780
292	2.883	2526134
293	2.914	2554361
294	2.945	2580625
295	2.976	2621884
296	3.007	2702404
297	3.038	2784305
298	3.069	2814080
299	3.1	2835308
300	3.131	2849294
301	3.162	2824341
302	3.193	2787787
303	3.224	2716143
304	3.255	2673287
305	3.286	2636350
306	3.317	2596887
307	3.348	2569185
308	3.379	2524980
309	3.41	2533111
310	3.441	2552336
311	3.472	2572693
312	3.503	2634211
313	3.534	2687318
314	3.565	2763216
315	3.596	2807956
316	3.627	2839163
317	3.658	2840532
318	3.689	2776471
319	3.72	2725953
320	3.751	2673418
321	3.782	2617378
322	3.813	2565703
323	3.844	2502643
324	3.875	2462411
325	3.906	2431902
326	3.937	2424466
327	3.968	2476988
328	3.999	2479804
329	4.03	2513734
330	4.061	2539089
331	4.092	2659626
332	4.123	2716780
333	4.154	2724856
334	4.185	2734249
335	4.216	2717107
336	4.247	2704135
337	4.278	2665896
338	4.309	2620644
339	4.34	2589919
340	4.371	2561558
341	4.402	2546884
342	4.433	2519912
343	4.464	2483284
344	4.495	2468805
345	4.526	2487015
346	4.557	2484936
347	4.588	2488250
348	4.619	2500831
349	4.65	2588996
350	4.681	2651596
351	4.712	2682974
352	4.743	2684094
353	4.774	2655045
354	4.805	2608286
355	4.836	2563961
356	4.867	2515887
357	4.898	2464565
358	4.929	2434472
359	4.96	2382320
360	4.991	2367364
361	5.022	2318849
362	5.053	2339447
363	5.084	2358611
364	5.115	2379375
365	5.146	2434065
366	5.177	2476631
367	5.208	2542034
368	5.239	2569240
369	5.27	2592098
370	5.301	2606101
371	5.332	2572732
372	5.363	2525932
373	5.394	2492349
374	5.425	2461774
375	5.456	2441057
376	5.487	2420007
377	5.518	2377391
378	5.549	2342866
379	5.58	2312300
380	5.611	2283564
381	5.642	2263970
382	5.673	2219863
383	5.704	2186852
384	5.735	2214399
385	5.766	2243808
386	5.797	2250433
387	5.828	2280802
388	5.859	2341464
389	5.89	2423032
390	5.921	2492510
391	5.952	2501825
392	5.983	2500329
393	6.014	2462854
394	6.045	2430674
395	6.076	2405472
396	6.107	2351192
397	6.138	2293954
398	6.169	2249649
399	6.2	2205713
400	6.231	2175346
401	6.262	2115318
402	6.293	2080314
403	6.324	2079427
404	6.355	2133387
405	6.386	2187173
406	6.417	2213602
407	6.448	2258343
408	6.479	2337885
409	6.51	2426182
410	6.541	2482447
411	6.572	2486821
412	6.603	2468392
413	6.634	2429827
414	6.665	2415448
415	6.696	2375048
416	6.727	2336577
417	6.758	2305401
418	6.789	2263418
419	6.82	2243821
420	6.851	2174646
421	6.882	2128783
422	6.913	2090718
423	6.944	2053490
424	6.975	2044310
425	7.006	2072596
426	7.037	2096226
427	7.068	2112815
428	7.099	2147129
429	7.13	2216991
430	7.161	2272204
431	7.192	2278569
432	7.223	2273799
433	7.254	2246295
434	7.285	2208114
435	7.316	2130178
436	7.347	2060375
437	7.378	2033566
438	7.409	2048474
439	7.44	2039174
440	7.471	2045233
441	7.502	2044188
442	7.533	2045246
443	7.564	2050548
444	7.595	2033396
445	7.626	2028170
446	7.657	2027666
447	7.688	2091636
448	7.719	2121462
449	7.75	2140714
450	7.781	2170784
451	7.812	2236925
452	7.843	2339979
453	7.874	2422658
454	7.905	2428900
455	7.936	2417462
456	7.967	2387667
457	7.998	2352687
458	8.029	2330274
459	8.06	2290656
460	8.091	2258556
461	8.122	2230042
462	8.153	2203719
463	8.184	2180508
464	8.215	2141527
465	8.246	2116660
466	8.277	2102912
467	8.308	2092636
468	8.339	2056914
469	8.37	2041219
470	8.401	2038015
471	8.432	2086894
472	8.463	2130861
473	8.494	2127990
474	8.525	2163128
475	8.556	2224708
476	8.587	2302523
477	8.618	2402159
478	8.649	2395658
479	8.68	2366696
480	8.711	2329482
481	8.742	2285478
482	8.773	2246531
483	8.804	2189517
484	8.835	2149614
485	8.866	2117505
486	8.897	2094295
487	8.928	2074237
488	8.959	2037380
489	8.99	2013963
490	9.021	1990953
491	9.052	1982037
492	9.083	1954536
493	9.114	1940416
494	9.145	1980777
495	9.176	1993728
496	9.207	2015008
497	9.238	2015656
498	9.269	2032211
499	9.3	2114356
500	9.331	2188051
501	9.362	2224179
502	9.393	2232308
503	9.424	2214015
504	9.455	2195405
505	9.486	2170291
506	9.517	2155888
507	9.548	2135326
508	9.579	2102804
509	9.61	2076629
510	9.641	2061612
511	9.672	2049914
512	9.703	2047150
513	9.734	2010027
514	9.765	1988004
515	9.796	1968958
516	9.827	1968068
517	9.858	1938578
518	9.889	1969101
519	9.92	2032626
520	9.951	2055796
521	9.982	2091465
522	10.013	2077976
523	10.044	2115412
524	10.075	2242909
525	10.106	2295028
526	10.137	2302326
527	10.168	2261693
528	10.199	2228066
529	10.23	2192292
530	10.261	2152759
531	10.292	2125639
532	10.323	2060392
533	10.354	2021230
534	10.385	1989145
535	10.416	1960681
536	10.447	1955402
537	10.478	1938599
538	10.509	1968990
539	10.54	2021874
540	10.571	2032665
541	10.602	2045106
542	10.633	2069425
543	10.664	2120518
544	10.695	2179696
545	10.726	2207317
546	10.757	2206661
547	10.788	2167391
548	10.819	2134675
549	10.85	2095837
550	10.881	2068533
551	10.912	2041031
552	10.943	1996850
553	10.974	1968951
554	11.005	1944049
555	11.036	1920313
556	11.067	1903778
557	11.098	1861420
558	11.129	1841124
559	11.16	1818547
560	11.191	1801672
561	11.222	1803880
562	11.253	1787640
563	11.284	1772214
564	11.315	1757099
565	11.346	1737823
566	11.377	1725815
567	11.408	1693428
568	11.439	1677208
569	11.47	1669119
570	11.501	1680628
571	11.532	1665452
